# Supplementary material for: Characterization of the Common Genetic Variation in the Spanish Population of Navarre
Source: MDPI journal article supplement (doi:10.3390/genes15050585), 2024-05-04

# Characterization of the common genetic variation among the Spanish population of Navarre

## Supplementary Information

### Supplementary Figures

**Figure S1:** Accumulative number of new variants contributed by individuals **a)** All common variants in NAVARREsel (21,174 SNVs). **b)** The 676 variants are exclusively common in NAVARREsel and validated in NAVARREval.

**Figure S2:** **a)** Principal component analysis of overlapped variants between NAVARREsel, MGP, and 1KGP (including all populations), and coloured by superpopulations. **b)** Principal component analysis of overlapped variants between NAVARREsel, MGP, and 1KGP (including exclusively European populations).

**Figure S3:** Genetic admixture analysis of 1128 individuals from 7 European populations, at an individual level, for the optimal  $K$  value = 3.

**Figure S4:** Comparison of MAF between NAVARREsel and NAVARREval encompassing both validated and non-validated variants, with a total of 998 SNVs.

**Figure S5:** Minor allele frequency spectrum for the following distinct sets: 21,174 common variants in NAVARREsel (blue colour); 1069 common variants in NAVARREsel but not in *1KGP\_noIBS*, gnomAD and *spain* (pink); and 676 common variants in both NAVARREsel (green) and NAVARREval (yellow). Common variants are defined with a MAF > 1%.

## Supplementary Tables

**Table S1:**  $F_{st}$  values between Navarre against MGP and 1KGP populations.

**Table S2:** Variants' information of the 676 exclusively common SNVs of the Navarre population.

Details: "CHR": chromosome; "Position": variant position; "REF": reference allele; "ALT": alternate allele; "NAVARREsel\_maf": MAF in NAVARREsel cohort; "NAVARREval\_maf": MAF in NAVARREval cohort; "1KGP\_phase3noIBS": MAF in 1KGP excluding IBS cohort; "Spain": MAF in *spain* cohort (combining IBS and MGP); "gnomAD": MAF in gnomAD; "Gene": gene where the variant is located; "Type": type of variant; "ExonicInfo": exonic variant type, if applicable; "ClinVar": ClinVar information; "SpliceAI": Splice AI results; "REVEL": REVEL results; "CADD": CADD results; "Polyphen2": Polyphen2 results.

Figure S1

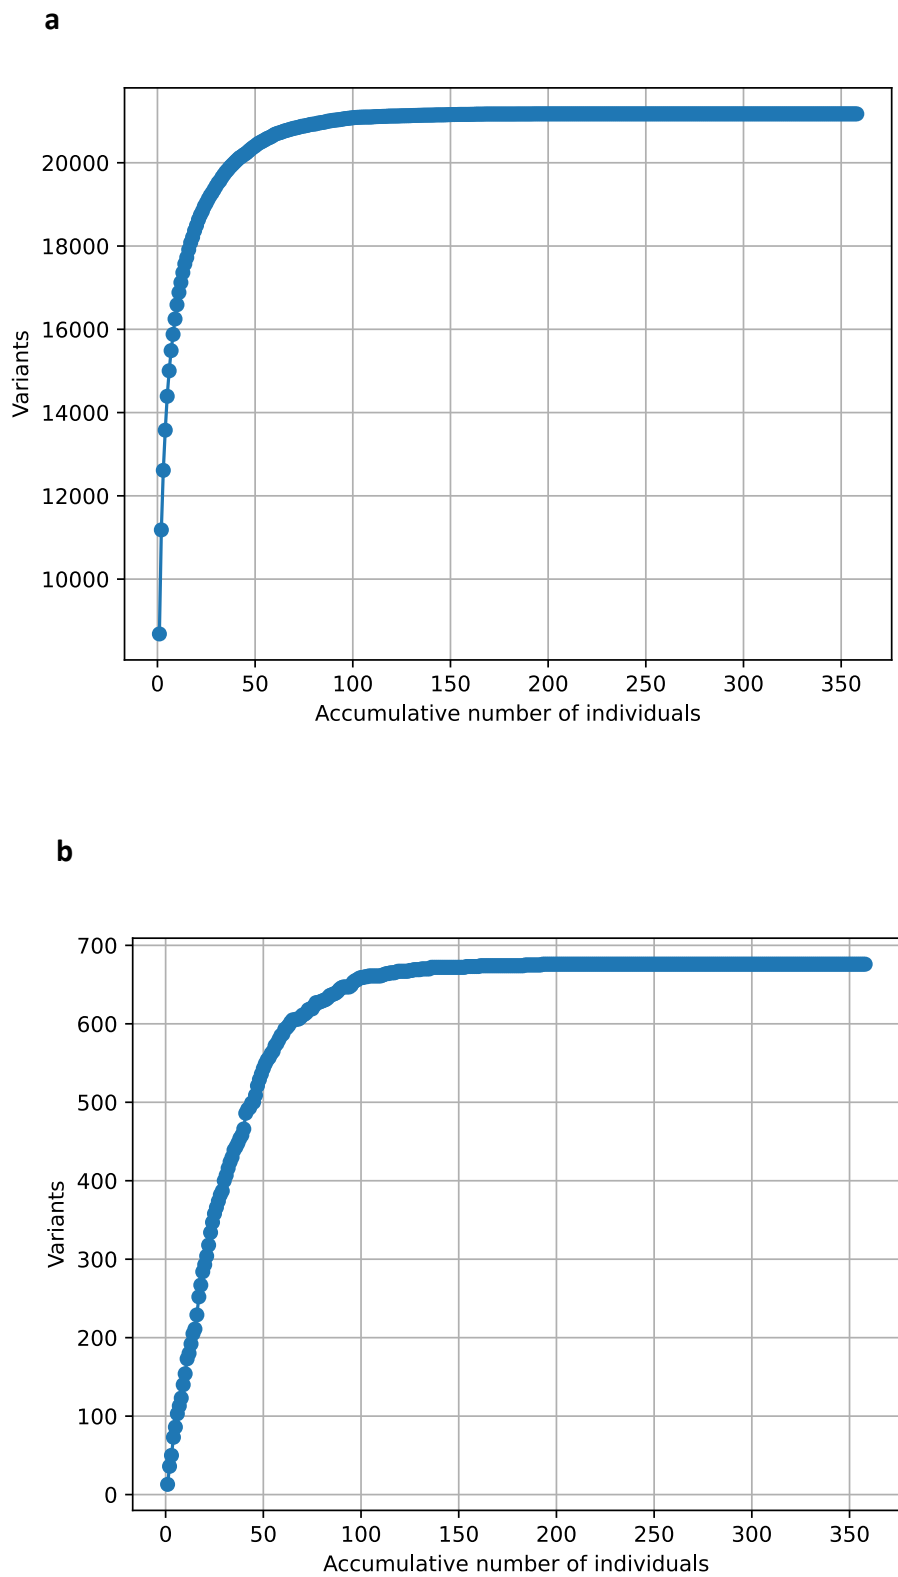

Figure S2

a

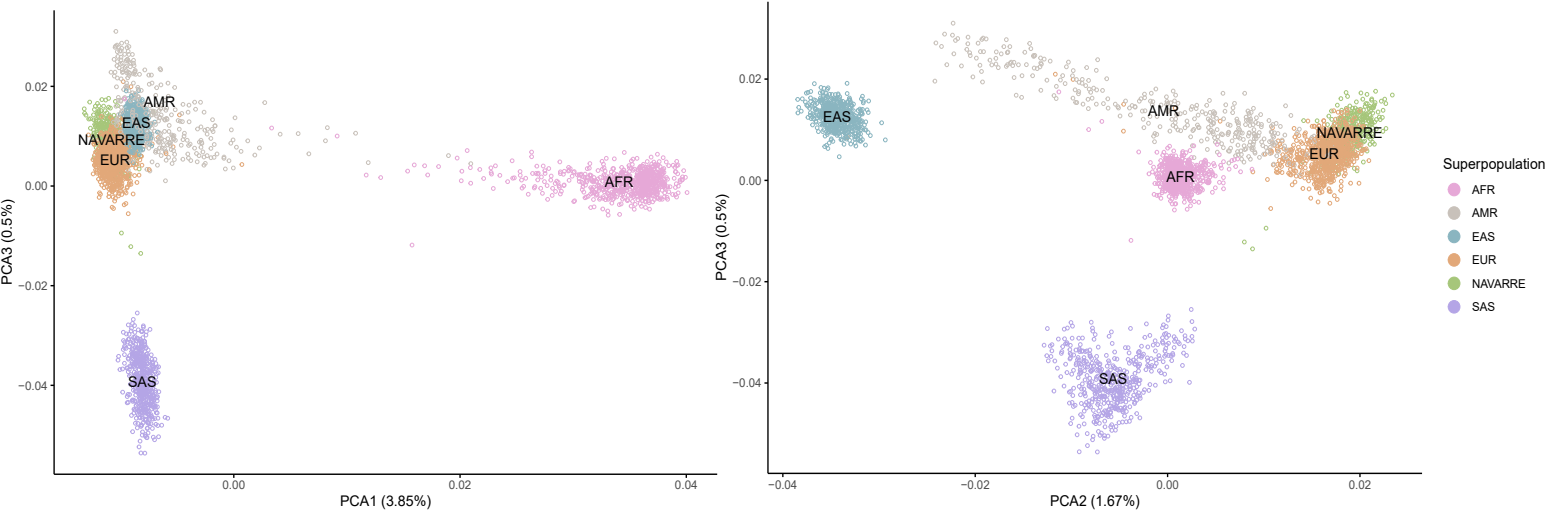

b

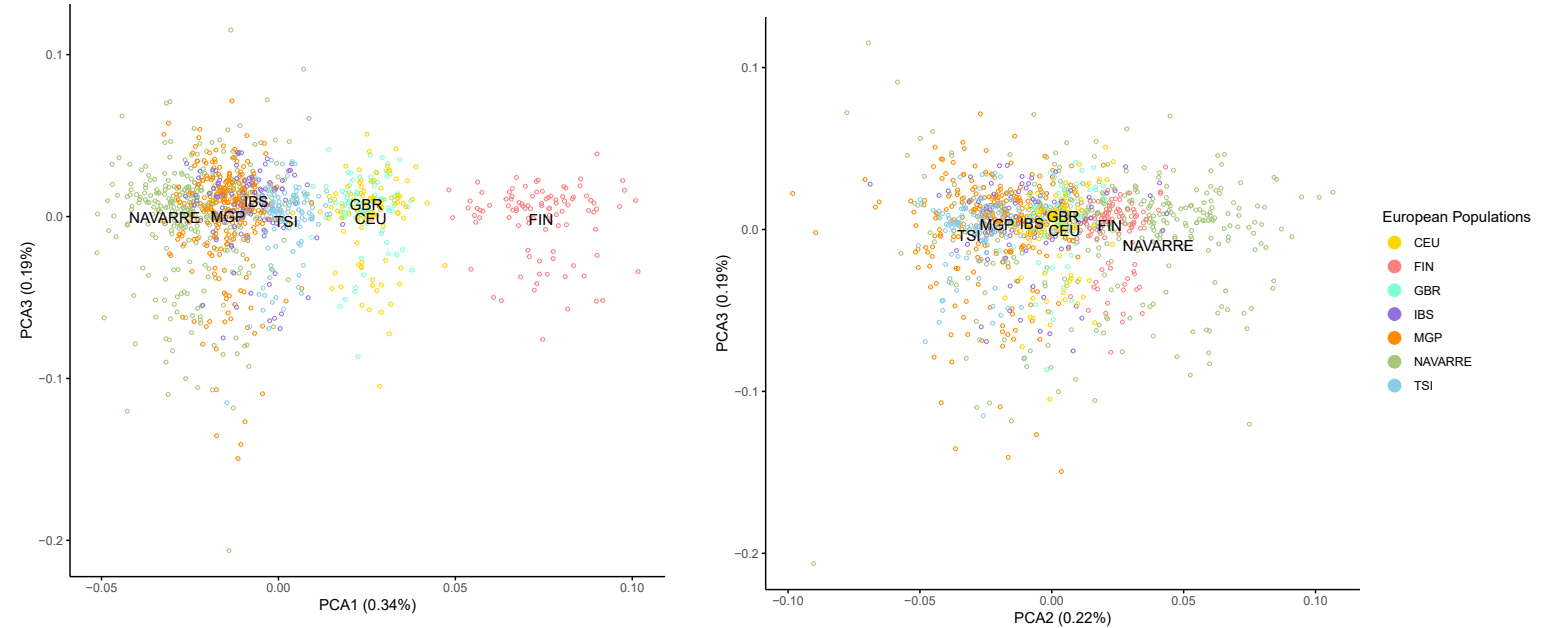

Figure S3

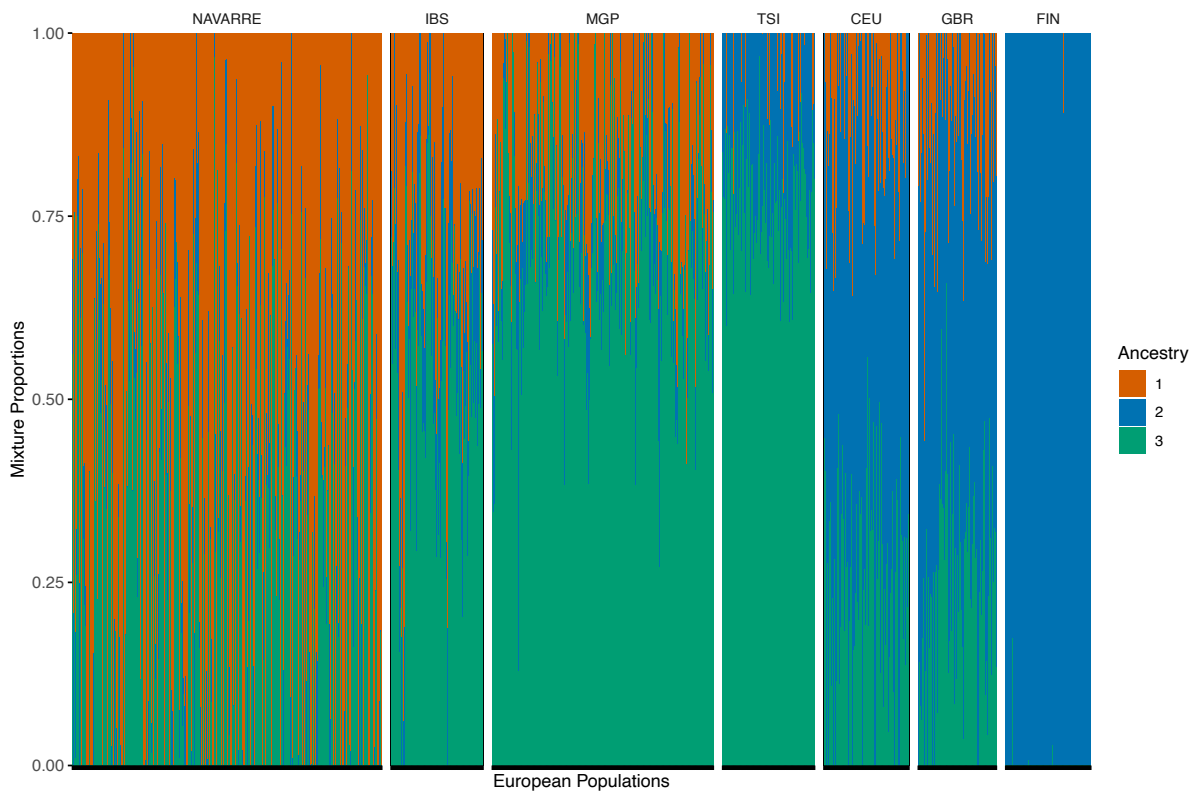

Figure S4

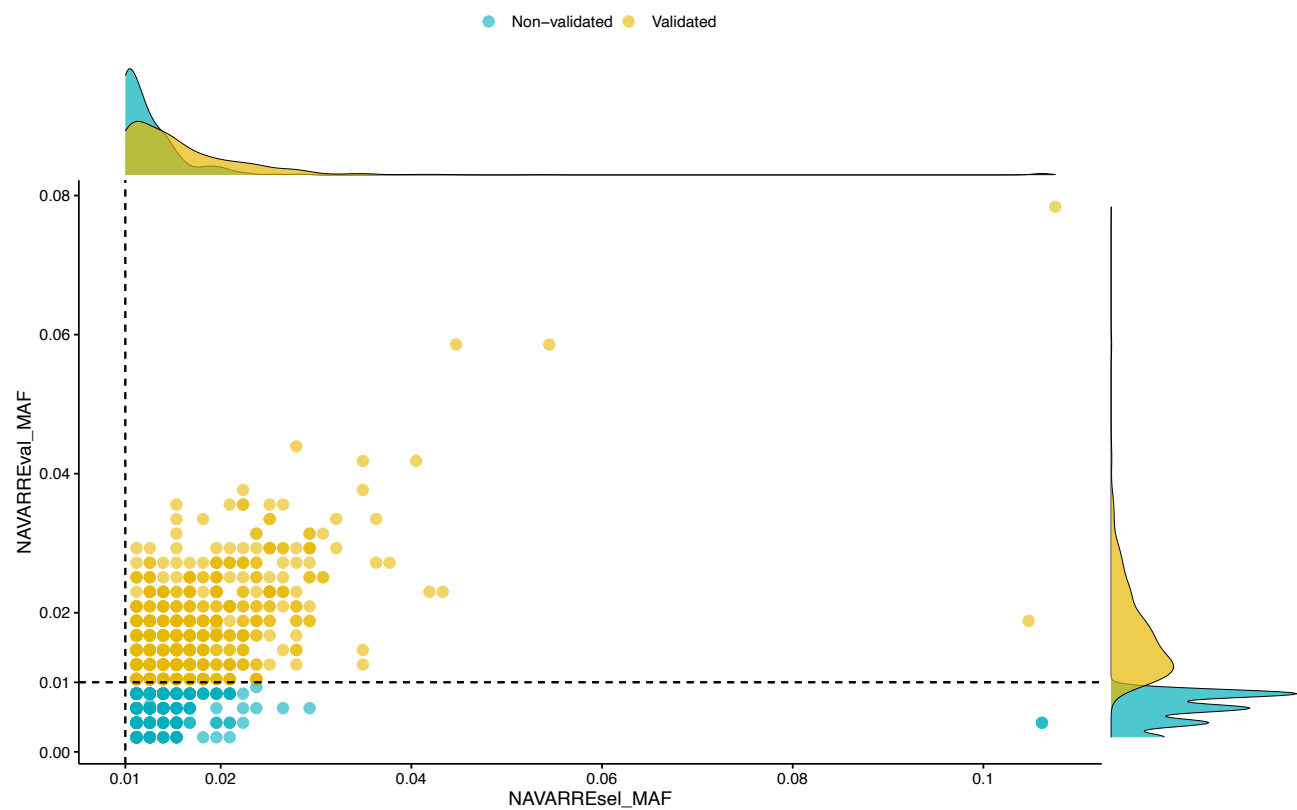

Figure S5

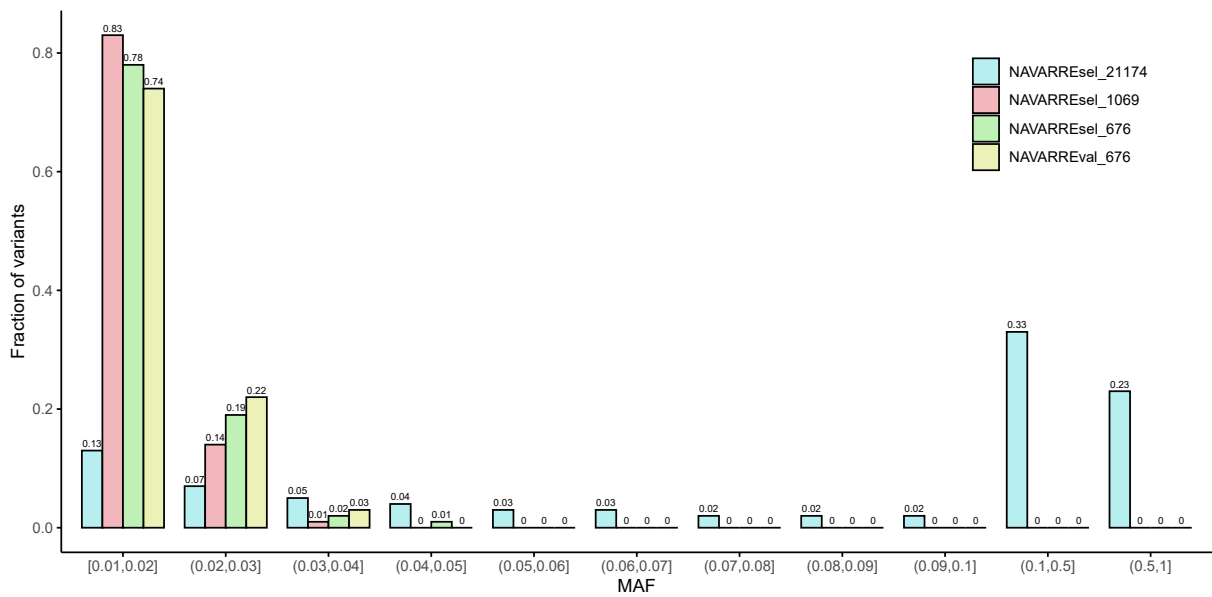

Supplement: s1 [file s1]
